RESEARCH ARTICLE

# Health Service Utilization for Mental, Behavioural and Emotional Problems among Conflict-Affected Population in Georgia: A Cross-Sectional Study

Ivdy Chikovani<sup>1</sup>✉, Nino Makhshvili<sup>2</sup>✉, George Gotsadze<sup>1‡</sup>, Vikram Patel<sup>3‡</sup>, Martin McKee<sup>3‡</sup>, Maia Uchaneishvili<sup>1‡\*</sup>, Natia Rukhadze<sup>1‡</sup>, Bayard Roberts<sup>3</sup>✉

**1** Curatio International Foundation, Tbilisi, Georgia, **2** Global Initiative on Psychiatry, Tbilisi, Georgia and Ilia State University, Tbilisi, Georgia, **3** London School of Hygiene and Tropical Medicine, London, United Kingdom

✉ These authors contributed equally to this work.

‡ These authors also contributed equally to this work.

\* [m.uchaneishvili@curatio.com](mailto:m.uchaneishvili@curatio.com)

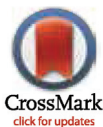

**OPEN ACCESS**

**Citation:** Chikovani I, Makhshvili N, Gotsadze G, Patel V, McKee M, Uchaneishvili M, et al. (2015) Health Service Utilization for Mental, Behavioural and Emotional Problems among Conflict-Affected Population in Georgia: A Cross-Sectional Study. PLoS ONE 10(4): e0122673. doi:10.1371/journal.pone.0122673

**Academic Editor:** Jan L. Wallander, Merced, UNITED STATES

**Received:** February 17, 2014

**Accepted:** February 24, 2015

**Published:** April 8, 2015

**Copyright:** © 2015 Chikovani et al. This is an open access article distributed under the terms of the [Creative Commons Attribution License](http://creativecommons.org/licenses/by/4.0/), which permits unrestricted use, distribution, and reproduction in any medium, provided the original author and source are credited.

**Funding:** This study was supported by the Wellcome Trust, grant number (093562/Z/10/Z). <http://www.wellcome.ac.uk>. The funder had no role in study design, data collection and analysis, decision to publish, or preparation of the manuscript.

**Competing Interests:** The authors have declared that no competing interests exist.

## Abstract

### Background

There is large gap in mental illness treatment globally and potentially especially so in war-affected populations. The study aim was to examine health care utilization patterns for mental, behavioural and emotional problems among the war-affected adult population in the Republic of Georgia.

### Methods

A cross-sectional household survey was conducted among 3600 adults affected by 1990s and 2008 armed conflicts in Georgia. Service use was measured for the last 12 months for any mental, emotional or behavioural problems. TSQ, PHQ-9 and GAD-7 were used to measure current symptoms of PTSD, depression and anxiety. Descriptive and regression analyses were used.

### Results

Respondents were predominantly female (65.0%), 35.8% were unemployed, and 56.0% covered by the government insurance scheme. From the total sample, 30.5% had symptoms of at least one current mental disorder. Among them, 39.0% sought care for mental problems, while 33.1% expressed facing barriers to accessing care and so did not seek care. General practitioners (29%) and neurologists (26%) were consulted by the majority of those with a current mental disorder who accessed services, while use of psychiatric services was far more limited. Pharmacotherapy was the predominant type of care (90%). Female gender (OR 1.50, 95% CI: 1.25, 1.80), middle-age (OR 1.83, 95% CI: 1.48, 2.26) and older-age (OR 1.62, 95% CI: 1.19, 2.21), possession of the state insurance coverage (OR

1.55, 95% CI: 1.30, 1.86), current PTSD symptoms (OR 1.56, 95% CI: 1.29, 1.90) and depression (OR 2.12, 95% CI: 1.70, 2.65) were associated with higher rates of health service utilization, while employed were less likely to use services (OR 0.71, 95% CI: 0.55, 0.89).

## Conclusions

Reducing financial access barriers and increasing awareness and access to local care required to help reduce the burden of mental disorders among conflict-affected persons in Georgia.

## Introduction

Health system responses to mental illness are almost always inadequate, with a large gap between those who require mental health care and those who actually receive effective treatment [1][2],[3]. The gap is potentially also wide in war-affected communities, with their high mental disease burden from the trauma and daily stressors of war and their weak health infrastructure [4],[5],[6]. Yet the limited research on utilization of health services by persons exposed to armed conflict has largely been among those seeking asylum abroad or among military veterans, with much less being undertaken among the much higher numbers of civilians that are still living in conflict or post-conflict settings.

Georgia has around 200,000 internally displaced persons (IDPs). The majority were displaced by the separatist wars of the 1990s in South Ossetia and Abkhazia, and around 20,000 also remain displaced from the 2008 war with Russia over South Ossetia [7],[8]. Approximately 40% of the IDPs reside in collective centers, with the remaining IDPs living in private accommodation. Collective centers represent former public buildings such as kindergartens, schools, administrative buildings or newly built “cottages” in a purpose-built villages constructed by the government after the 2008 conflict. IDP communities are characterised by poor living conditions, high unemployment, poverty, limited integration with local communities and financial barriers to access health care and medicines [9],[10],[11].

Services for mental disorders are funded by the government through the *State Program for Mental Health* (SPMH). The SPMH offers services to all citizens of Georgia, with services delivered in outpatient clinics (‘psycho-neurological dispensaries’) and specialised inpatient facilities or psychiatric departments in general hospitals [12]. Outpatient and inpatient care is free, including medications. Inpatient services cover all mental disorders, while some disorders (e.g. anxiety and obsessive-compulsive disorders) are excluded from the outpatient package (see Table 1).

In addition to the SPMH mental health care, GPs also provide care for mild depression management under the government’s general insurance scheme. GPs are also authorised to prescribe antidepressant medications but the costs of these medications are not covered. Since 2006, the general health insurance scheme is free for persons living below the poverty line [13] and those who were displaced from the 2008 conflict and who remained in collective centers [14]. However, those displaced during the conflict in the early 1990s or in the 2008 conflict and who have subsequently returned to their villages are only included if they meet the eligibility criteria for poverty applied to the general population.

There is extremely limited research on the mental health of IDPs in Georgia despite risk-factors of trauma exposure, forced displacement, daily stressors and impoverishment [15]. To the best of our knowledge, no quantitative study has previously been conducted on mental health

**Table 1. Mental health services by different state programs and providers.**

| Health care provider                         | Health care facility                                 | Funding Source                          | MH services                                                                                                                                                                          |
|----------------------------------------------|------------------------------------------------------|-----------------------------------------|--------------------------------------------------------------------------------------------------------------------------------------------------------------------------------------|
| Pharmacy                                     | Retail drug store                                    | Out of pocket payment                   | Drug selling; advice on drugs                                                                                                                                                        |
| GP                                           | GP office, ambulatory, polyclinic                    | Government insurance                    | Management of mild depression and prescription of antidepressants, free outpatient MH. However, free medications are not provided.                                                   |
| Neurologist                                  | Polyclinic                                           | Government insurance                    | No mental health disorders are covered by Government insurance, except management of mild depression and prescription of antidepressants (but free MH medications are not provided)  |
| Neurologist                                  | Hospital                                             | Government insurance,                   | No mental health disorders are covered by Government insurance, except management of mild depression and prescription of antidepressants (but free MH medications are not provided). |
| Psychiatrist                                 | Outpatient clinic (dispensary)                       | SPMH                                    | Outpatient care (defined list of mental disorders), counseling, free outpatient MH medication provision                                                                              |
| Psychiatrist                                 | General hospital or psychiatric hospital             | SPMH                                    | Inpatient care (all mental disorders requiring inpatient treatment), counseling, free medications                                                                                    |
| Psychiatrist, Psychologist, Psychotherapist  | Private clinic                                       | Out of pocket payment                   | Counseling, psychotherapy, medication therapy                                                                                                                                        |
| Psychiatrist, Psychotherapist, Social worker | Psychosocial rehabilitation centers; Mobile services | Donor funds; Few centers funded by SPMH | Multidisciplinary case management, free outpatient medication provision                                                                                                              |

SPMH, State Program for Mental Health.

doi:10.1371/journal.pone.0122673.t001

service utilisation among conflict-affected persons in Georgia. The only study on this topic we could identify was a qualitative study conducted in 2012 among 39 older IDPs investigated health care seeking behaviour for mental health problems [16]. Indeed, there has been no quantitative research on mental health service utilisation patterns among the general population in Georgia.

This paper presents findings from the first large-scale epidemiological mental health study with the adult conflict-affected adult population in Georgia (for further details, please see [15] [17] [18]). The aim of this paper is to examine health care utilization patterns for mental, behavioural and emotional problems among the war-affected adult population in the Republic of Georgia. The specific objectives are to: 1) measure health service utilization rates; 2) identify reasons why those in need did not seek care; 3) describe types of health services used; and 4) identify determinants of health service utilization.

## Methods

### Sample

The study used a cross-sectional survey design with multi-stage random sampling, with stratification by region and displacement status. A total sample of 3600 men and women aged 18 years and over was determined for the overall study and not specifically for the health service utilization component [15]. The sample consisted of 1200 respondents from each of the 3 main conflict-affected populations in Georgia: those displaced as a result of conflicts in the 1990s ('1990s IDPs'); those displaced after the 2008 conflict ('2008 IDPs'); and individuals affected by 2008 conflict who have returned to their home areas after being displaced or who did not change their location but experienced armed conflict ('returnees').

Primary sampling units (N = 360; 120 per population group) were selected based on probability proportional to size using a sampling frame of population lists in formal and informal IDP settlements provided by the Ministry of Internally Displaced Persons, and lists of villages

in the border region with South Ossetia provided by the Governor's office in Shida Kartli region. These were considered to be the most accurate lists available. The IDP lists were complete as they were recently updated by the Ministry of Internally Displaced Persons. Likewise the returnee's lists were complete and accurate as they were based on regular information provided by administrative heads of villages. Within each primary sampling unit, the random walk method was used to randomly select households. Within the selected household, one person (aged  $\geq 18$  years) was randomly selected to be interviewed (based on nearest birthday). If the person was not reached after 3 visits (on different days and at different times), the next household on the route was visited, with the same process used for refusals or interrupted interviews to reach the desired sample of 3600 respondents. The overall response rate for the survey was 79%. Non-responses were due to: household member still not available after 3 call backs (N = 800); refusals (N = 166); and interrupted interviews (N = 10).

Data collection took place between October and December 2011. Face-to-face interviews took place in the respondents' homes and the questionnaires were administered by trained fieldworkers. All interviews were conducted in Georgian. All respondents provided written informed consent prior to their inclusion in the study. Full respondent anonymity was assured. People with severe intellectual or mental impairment with reduced ability to communicate were excluded from the study. The National Council on Bioethics in Georgia and the London School of Hygiene and Tropical Medicine provided ethical approval for this study.

### Measure of health service utilization

Respondents were asked whether they had feelings such as anxiety, nervousness, depression, insomnia or any other emotional or behavioural problems for which they sought health care during the 12 months prior to interview. Those that had sought some kind of care were then asked what type it was. These were classified as: pharmacy; General Practitioner's (GP) office, ambulatory or polyclinic; neurologist at polyclinic; neurologist or therapist at hospital; psychiatrist at outpatient clinic (dispensary); psychiatrist at hospital; psychosocial center, private mental health specialist; outreach/mobile services. These are described in [Table 1](#). Respondents who had sought care were also asked what type of treatment they received, classified as: medication treatment, counselling and psychotherapy/psychosocial support. The terms "counselling" and "psychotherapy/psychosocial support" were not specifically explained, as they are commonly understood. In general the terms are commonly defined as: counselling—a conversation with a doctor where the doctor gives advice, prescribes drugs, etc; and psychotherapy—treatment without medications through interactions with a specialist (psychologist, psychiatrist). Respondents who self-reported having mental, emotional or behavioural problems but did not use health services were asked additional questions about reasons for not seeking care.

### Measurement of mental disorders:

In addition to the single question on self-reported mental, emotional or behavioural problems, instruments were used to measure the prevalence of symptoms of Post-Traumatic Stress Disorder (PTSD), depression and anxiety. PTSD was measured using the Trauma Screening Questionnaire (TSQ) which consists of 10 questions on experiencing PTSD symptoms over the past 1 week with yes = 1, no = 0 responses. The overall score (sum) ranges from 0 to 10 with TSQ's suggested cut-off of  $>6$  used to indicate current PTSD symptoms that may be indication of possible PTSD [19]. Symptoms of depression were measured using the Patient Health Questionnaire (PHQ-9), consisting of 9 questions about experience of symptoms of depression over the last 2 weeks. The responses ranged from 0 = not at all to 3 = nearly every day. The item scores are summed to produce a total score range 0 to 27 with the PHQ-9's suggested cut-off

of  $\geq 10$  used to indicate current depression symptoms or possible depression disorder [20]. Symptoms of anxiety were measured using the Generalised Anxiety Disorder (GAD-7) instrument, which consists of 7 questions on experience of anxiety symptoms over the last 2 weeks. The GAD-7 questionnaire uses the response options and scoring as PHQ-9, with suggested cut-off  $\geq 10$  to indicate moderated current anxiety symptoms or possible anxiety disorder [21]. TSQ, PHQ-9, and GAD-7 showed good reliability with Cronbach's alpha scores of 0.86, 0.86, 0.90 respectively; and results from a separate test-retest mini survey ( $N = 110$ ) produced intra-class correlation coefficients (ICC) of 0.97, 0.98, and 0.96 respectively. Further details on the reliability and validity of the study instruments are described by Makhashvili et al [15]. There was overlap between the 3 measures and we did not treat them separately as mutually exclusive conditions. The confidence intervals for them in the results are therefore intended to show the precision of the results rather than for a comparison between the mental health conditions.

Socio-demographic characteristics were also included in the questionnaire. These included age, gender, education level, marital status, living conditions, employment status, household economic status.

Instrument translation used standard procedures involving: (i) translation from English into Georgian using professional translators, with translations reviewed by Georgian mental health experts individually and then as a group for cultural relevance, content and concept consistency, clarity and understanding; (ii) a back-translation to check for accuracy, consistency and equivalence, with adjustments made accordingly; and (iii) piloting and field testing to refine the instruments further [22]. Trained and experienced professional fieldworkers were used, with the interviewers trained by the research staff with participation of the mental health expert.

## Statistical analyses

Patterns of service utilization by type of mental health disorder and by type of services used, and reasons for not using services, were described using Chi square tests to compare groups. To assess the influence of different variables on health service utilization, multivariate logistic regression was carried out. The dependent variable—service utilization—is defined as visiting any type health care provider at formal health services for behavioural or emotional problem during last 12 months. Health care provider refers to pharmacist, GP, neurologist, mental health specialist (psychiatrist, psychologist, psychotherapist). Health services refer to pharmacy, GP office / polyclinic, general hospital, psychiatric outpatient clinic, psychiatric hospital/department, private clinic, psychosocial rehabilitation center, mobile services. In the first stage of the regression analysis two blocks of independent variables were formed of socio-demographic and health related variables. The socio-demographic block comprised gender, age, marital status, education, economic status, employment, displacement status and possession of health insurance. A health related block included current PTSD, depression and anxiety symptoms as one subgroup and co-morbidity ( $> 1$  of these possible mental disorders) as a separate variable. Multivariate regression analysis was run separately for each block and co-morbidity was independently tested by univariate analyses. The independent variables that were not significantly ( $P < .05$ ) associated with the dependent variable were excluded from the final model. Multicollinearity diagnostics was conducted for: for socio-demographic variables (gender, age, economic status, employment, displacement status, possession of health insurance) with separate outcomes of possible PTSD, depression, anxiety and comorbidity. The findings indicated no significant multicollinearity.

The sample was weighted to reflect the actual proportions of 'old IDPs', 'new IDPs' and 'returnees' in the overall conflict-affected population of Georgia. Cases for which there were

missing data were dropped from the analysis (<2% for the key dependent and independent variables of interest). Data analysis was performed in SPSS 18.0. Statistical significance was taken as  $P < 0.05$ .

## Results

The sample characteristics are presented in [Table 2](#). Overall 65% were women, most were married, and 69.6% had complete secondary education, and 56% were covered by the government's general insurance scheme (94.6% among new IDPs, 59.2% among old IDPs, and 40.9% of among returnees). There were no major differences in the socio-demographic characteristics among the 3 IDP groups. Turning to mental health, 23.5% of respondents were classified with current PTSD symptoms, 14.4% with current depression symptoms and 10.9% with current anxiety symptoms. In the study sample, 30.5% had symptoms of at least one disorder, while 12.7% had symptoms of more than one disorder and 5.6% had symptoms of all three disorders. Further details on the prevalence of mental disorder symptoms by displacement groups are reported elsewhere [[15](#)].

### Service utilization

[Table 3](#) shows that a quarter (24.8%) of all respondents self-reported mental, behavioural or emotional problems and sought formal care during the preceding 12-month period. However, it is informative to focus on those meeting the criteria for having current symptoms of the three mental disorders of PTSD, depression and anxiety. Thirty nine percent of those with current symptoms of any of these 3 disorders (i.e.  $\geq 1$  disorder) and reporting having mental, emotional or behavioural problems over the past 12 months sought care; 33.1% reported such problems but did not seek care, and 27.4% did not report problems or seek care. Almost half of those meeting the criteria for current depression symptoms (48.1%), or when more than one disorder was present (47.5%), reported problem and sought care. A third of those with current symptoms for any of the three mental disorders reported emotional and behavioural problems but did not seek care. The proportion is similar among those with symptoms of PTSD or anxiety and having more than one condition.

From our total study sample, 790 (22%) individuals screened for current mental disorder symptoms and self-reported emotional or behavioural problem during last 12 months. Of these, 363 individuals did not seek care. The reasons why they did not seek care are shown in [Fig 1](#) (multiple responses were possible). The most common reasons were inability to afford care or drugs, with very few not seeking treatment because they either did not know where to go or had no insurance.

### Types of services utilized

[Table 4](#) presents the service providers and types of care used by those individuals who sought health care due to current emotional and behavioural problems, separating those not having current symptoms of one of the mental disorders measured in the study (i.e. PTSD, depression or anxiety) from those with symptoms of at least one of these disorders. Overall, there were not statistically significant differences in utilization rates between the two groups except for those with no current mental health disorder symptoms making statistically significant lower use of GP/ambulatory/ policlinic services (39.8% vs. 46.6%  $p = 0.04$ ), psychiatric dispensary services (0.6% vs. 2.3%  $p = 0.035$ ) and medication treatment (81.5% vs. 90.2%  $p < 0.001$ ). The majority (around 70%) in both groups used pharmacies, and around half in both groups consulted neurologist at hospital or outpatient clinic. Very few (1.2%) with current mental disorder symptoms attended psychiatric hospital during last 12 months. A further analysis (data not shown)

**Table 2. Description of the sample.**

|                                     | N = 3600 | %    |
|-------------------------------------|----------|------|
| <b>Gender</b>                       |          |      |
| Male                                | 1259     | 35.0 |
| Female                              | 2341     | 65.0 |
| <b>Age</b>                          |          |      |
| 18–39                               | 1248     | 34.7 |
| 40–59                               | 1254     | 34.8 |
| 60+                                 | 1098     | 30.5 |
| <b>Marital status</b>               |          |      |
| Single                              | 617      | 17.2 |
| Married/Cohabiting                  | 2123     | 59.0 |
| Seperated/DivorcedWidowed           | 855      | 23.8 |
| <b>Education</b>                    |          |      |
| Completed higher                    | 760      | 21.1 |
| Completed secondary school          | 2506     | 69.6 |
| Primary/incomplete secondary        | 334      | 9.3  |
| <b>Economic status *</b>            |          |      |
| Very good/Good/ average             | 1651     | 45.9 |
| Bad/ Very bad                       | 1947     | 54.1 |
| <b>Employment</b>                   |          |      |
| Unemployed                          | 1288     | 35.8 |
| Employed                            | 829      | 23.0 |
| Housewife /on maternity leave       | 448      | 12.4 |
| Retired due to age or disability    | 963      | 26.8 |
| Student                             | 71       | 2.0  |
| <b>Health Insurance</b>             |          |      |
| Government insurance scheme         | 2017     | 56.0 |
| Private or corporate insurance      | 77       | 2.1  |
| No insurance                        | 1486     | 41.3 |
| <b>Displacement status</b>          |          |      |
| New IDPs                            | 335      | 9.3  |
| Old IDPs                            | 2053     | 57.0 |
| Returnees                           | 1211     | 33.7 |
| <b>Mental disorder symptoms</b>     |          |      |
| PTSD symptoms <sup>1</sup>          | 844      | 23.5 |
| Depression symptoms <sup>2</sup>    | 519      | 14.4 |
| Anxiety symptoms <sup>3</sup>       | 394      | 10.9 |
| No symptoms of mental disorder      | 2503     | 69.5 |
| Symptoms of at least one disorder   | 1096     | 30.5 |
| Symptoms for more than one disorder | 458      | 12.7 |
| Symptoms for all three disorders    | 203      | 5.6  |

<sup>1</sup> = TSQ score >6.

<sup>2</sup> = PHQ-9 score of ≥10.

<sup>3</sup> = GAD-7 score of ≥10.

\* self-reported against these categories.

doi:10.1371/journal.pone.0122673.t002

**Table 3. Service utilization for mental health, any emotional or behavioural problems during last 12 months by presence of mental health disorder symptoms.**

|                                  | Total    | Self-reported problem and sought care |      |           | Self-reported problems but did not seek care |      |           | Did not have self-reported problem to seek care for |      |           |
|----------------------------------|----------|---------------------------------------|------|-----------|----------------------------------------------|------|-----------|-----------------------------------------------------|------|-----------|
|                                  |          | n                                     | %    | 95% CI    | N                                            | %    | 95% CI    | n                                                   | %    | 95% CI    |
| Total sample                     | N = 3600 | 892                                   | 24.8 | 23.4–26.2 | 706                                          | 54.8 | 53.2–56.4 | 1971                                                | 19.6 | 18.3–20.9 |
| Any mental health disorder       | N = 1096 | 427                                   | 39   | 35.7–42.3 | 363                                          | 33.1 | 30.0–36.4 | 300                                                 | 27.4 | 24.4–30.5 |
| Comorbidity                      | N = 458  | 217                                   | 47.5 | 42.9–52.6 | 157                                          | 34.4 | 29.5–39.4 | 79                                                  | 17.2 | 13.6–21.5 |
| PTSD symptoms <sup>1</sup>       | N = 844  | 335                                   | 39.7 | 36.4–43.0 | 274                                          | 27.7 | 24.7–30.7 | 234                                                 | 32.5 | 29.3–35.6 |
| Depression symptoms <sup>2</sup> | N = 519  | 250                                   | 48.1 | 43.8–52.4 | 176                                          | 16.7 | 13.4–19.9 | 86                                                  | 34   | 29.9–38.1 |
| Anxiety symptoms <sup>3</sup>    | N = 394  | 168                                   | 42.7 | 37.7–47.6 | 137                                          | 21.6 | 17.6–25.7 | 85                                                  | 34.9 | 30.1–39.6 |

The Confidence Intervals (CI) are provided to show the precision of the results and are not intended for a comparison between the mental health groupings as there is overlap between the mental health grouping and they were not treated as mutually exclusive.

<sup>1</sup> = TSQ score >6.

<sup>2</sup> = PHQ-9 score of ≥10.

<sup>3</sup> = GAD-7 score of ≥10.

doi:10.1371/journal.pone.0122673.t003

found no statistically significant ( $P < .05$ ) difference in the pattern of use among those screened with symptoms of the different mental health disorders.

Insured individuals were more likely to consult GPs for emotional and behavioural problems than those without health insurance (45.8% and 37.3% respectively,  $p = 0.019$ ), while those insured were less likely to use only a pharmacy than those without insurance (13.8% and 19.8% respectively,  $p = 0.025$ ) (not shown in the table).

The most common type of care was medication treatment followed by counselling, while very few received psychotherapy or psychosocial support (Table 4). No significant difference was found in the type of care used between respondents with different mental disorder symptoms.

### Characteristics associated with health care utilization

The multivariate regression analysis shows that displacement status (old, new and returnee) and economic condition were not associated with the probability of using services. However, being female (OR 1.50, 95% CI: 1.25, 1.80), being in middle age (OR 1.83, 95% CI: 1.48, 2.26) and 40 years and older (OR 1.62, 95% CI: 1.19, 2.21) and having the government’s general insurance coverage (OR 1.55, 95% CI: 1.30, 1.86) are significantly associated with higher rates of health service utilization for emotional and behavioural problems (Table 5). Those who were employed were less likely to use services (OR 0.71, 95% CI: 0.55–0.89). Being screened with current symptoms of PTSD (OR 1.56, 95% CI: 1.29–1.90) or depression (OR 2.12, 95% CI: 1.70–2.65) significantly increased odds of service use but anxiety symptoms did not in the univariate analysis and so anxiety was not included in the final model. Respondents with symptoms of more than one of the three disorders were more likely to consult health services.

### Discussion

This study provides new information on patterns of use of health services among those with assessed current mental disorder symptoms among conflict-affected persons in Georgia. No significant difference in service use among the different categories of IDPs and returnees which we henceforth collectively refer to as the war-affected population.



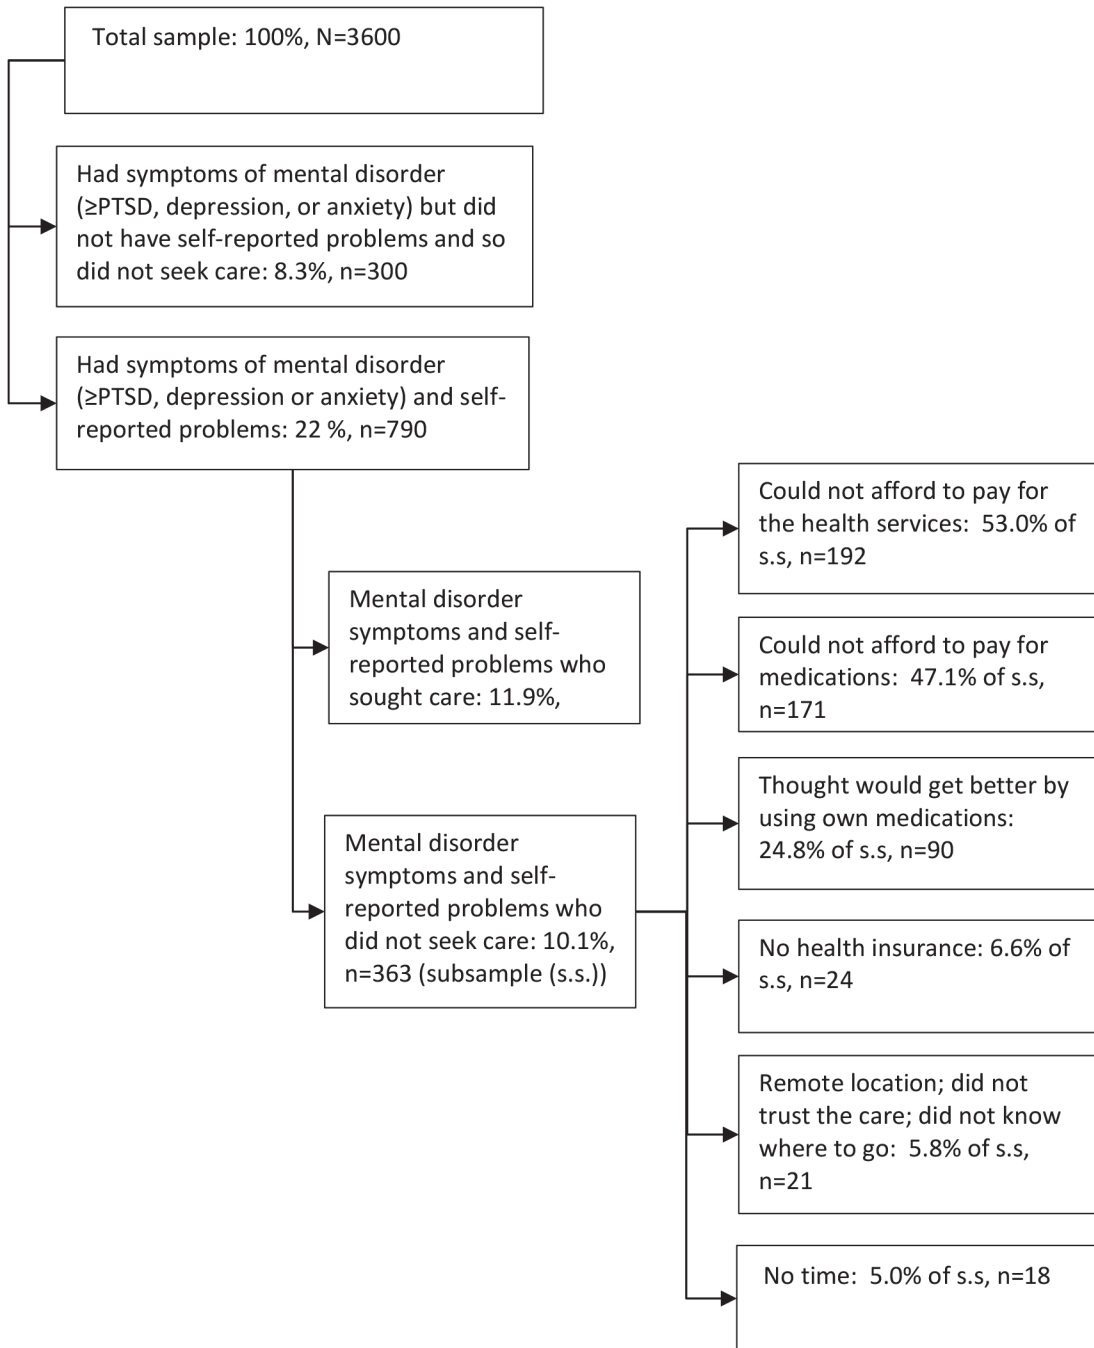

**Fig 1. Reasons of not seeking health care in the presence of mental health symptoms and any emotional or behavioural problems (multiple answers allowed).**

doi:10.1371/journal.pone.0122673.g001

We found that only just over a third of those with a current mental disorder sought any assistance from health services. The remainder (61%) did not use services because they did not report the presence of problems, despite meeting criteria for a current mental health disorder (27.4%) or faced real or perceived barriers to accessing care (33.1%).

This study adds to a sparse existing literature on this topic among conflict-affected civilian populations in low and middle income countries, most of which has been conducted in the

**Table 4. Type of care used among individuals who contacted formal health services for any mental health, emotional or behavioural problems during last 12 months by presence of current mental disorder symptoms.**

|                                            | No current mental disorder symptoms |           | Any current mental disorder symptoms <sup>1</sup> |           | Total       |           |
|--------------------------------------------|-------------------------------------|-----------|---------------------------------------------------|-----------|-------------|-----------|
|                                            | N = 465                             |           | N = 427                                           |           | N = 892     |           |
| Type of service provider                   | %                                   | 95% CI    | %                                                 | 95% CI    |             |           |
| Pharmacy                                   | <b>72.3</b>                         | 68.2–76.4 | <b>69.1</b>                                       | 64.7–73.5 | <b>70.7</b> | 67.7–73.7 |
| Only pharmacy use                          | <b>17.0</b>                         | 13.7–20.5 | <b>13.8</b>                                       | 10.6–17.2 | <b>15.6</b> | 13.2–18.0 |
| GP office /ambulatory / polyclinic         | <b>39.8</b>                         | 35.4–43.2 | <b>46.6</b>                                       | 44.2–51.3 | <b>43.1</b> | 39.8–46.3 |
| Only GP use                                | <b>29.0</b>                         | 24.5–33.9 | <b>28.6</b>                                       | 23.9–33.6 | <b>28.8</b> | 24.1–33.7 |
| Therapist/ Neurologist at Hospital         | <b>34.2</b>                         | 29.8–38.4 | <b>30.2</b>                                       | 25.9–34.7 | <b>32.3</b> | 29.2–35.4 |
| Neurologist at polyclinic                  | <b>20.5</b>                         | 16.8–24.2 | <b>26.0</b>                                       | 21.8–30.2 | <b>23.1</b> | 20.4–25.9 |
| Outreach/mobile services                   | <b>4.5</b>                          | 2.6–6.3   | <b>7.0</b>                                        | 4.7–9.5   |             |           |
| Psychiatric dispensary                     | <b>0.6</b>                          | 0.1–1.1   | <b>2.3</b>                                        | 1.2–3.9   | <b>1.5</b>  | 0.7–2.3   |
| Psychosocial center, Private MH specialist | <b>1.9</b>                          | 0.6–3.1   | <b>2.3</b>                                        | 0.9–3.9   | <b>2.1</b>  | 1.2–3.1   |
| Psychiatric hospital                       | <b>0.6</b>                          | 0.1–1.2   | <b>1.2</b>                                        | 0.1–2.1   | <b>0.8</b>  | 0.2–1.4   |
| Type of care                               |                                     |           |                                                   |           |             |           |
| Medication treatment                       | <b>81.5</b>                         | 78.0–85.1 | <b>90.2</b>                                       | 87.2–92.9 | <b>85.6</b> | 83.3–87.9 |
| Counselling                                | <b>84.1</b>                         | 80.8–87.5 | <b>84.5</b>                                       | 81.2–88.1 | <b>84.4</b> | 82.0–86.8 |
| Psychotherapy/ psychosocial support        | <b>2.8</b>                          | 1.3–4.2   | <b>4.9</b>                                        | 2.9–7.0   | <b>3.8</b>  | 2.5–5.0   |

<sup>1</sup> = Screened with symptoms of one of more of possible PTSD (TSQ score >6), depression (PHQ-9 score of ≥10), anxiety (GAD-7 score of ≥10).

doi:10.1371/journal.pone.0122673.t004

Balkans. A study conducted 8 years after the war in Kosovo found that 72% of people had used medical services in the past 12 months [23]. Another study from Kosovo, among female civilians 10 years after the war, found that more than half used health care services during the previous three months but only small minority used specialised mental health services [24]. A study of war-affected populations from the Balkan region observed general service use rates of between 61% to 94% and psychiatric service use ranged between 1.9% to 20.9% [6]. The other study among traumatised population from war-affected Balkan countries examined service use from the beginning of the conflict among individuals with mental disorders. Twenty six percent of those with current PTSD used mental health services, as did 18.1% of those with other mental disorders [25]. A study conducted using a similar methodology in Croatia found that 38.8% of individuals with current PTSD utilized mental health services since the beginning of the war [26]. However, comparison with these studies is challenging due to different study time periods and methodologies.

Our study findings on the factors influencing service utilization are consistent with existing evidence. Being female and middle or old age (40 and up) were significantly associated with service use. Higher utilization by women is a consistent finding in studies among war-affected populations [6], [23], [27]. Those who are employed were less likely to use health services for mental or behavioural problems but previous research finds an inconsistent association of employment and service use; one study of a war-affected population in Kosovo showed higher rates of utilization among employed persons [23] but another, of individuals with severe mental illness, found that steady employment was associated with significantly lower outpatient use [28]. Among individuals with current symptoms of mental health disorders, depressive disorder and PTSD symptoms were associated with higher odds of services use. Increased likelihood of service use of individuals with depressive disorder was also reported by previous studies [2], [27]. Our findings with regard to PTSD also resonate with other research among war affected

Table 5. Correlates of service utilization, multivariate logistic regression, final model.

|                                        | n   | %    | Service Utilization |    |             |             |
|----------------------------------------|-----|------|---------------------|----|-------------|-------------|
|                                        |     |      | Odds Ratio          |    | 95% CI      |             |
| <b>Gender</b>                          |     |      |                     |    |             |             |
| Male                                   | 240 | 19.1 | ref                 |    |             |             |
| Female                                 | 652 | 27.9 | <b>1.50</b>         | ** | <b>1.25</b> | <b>1.80</b> |
| <b>Age</b>                             |     |      |                     |    |             |             |
| 18–39                                  | 187 | 15.0 | ref                 |    |             |             |
| 40–59                                  | 343 | 27.4 | <b>1.83</b>         | ** | <b>1.48</b> | <b>2.26</b> |
| 60+                                    | 361 | 32.9 | <b>1.62</b>         | ** | <b>1.19</b> | <b>2.21</b> |
| <b>Economic status</b>                 |     |      |                     |    |             |             |
| Very good/Good/ average                | 313 | 19.0 | ref                 |    |             |             |
| Bad/ Very bad                          | 577 | 29.6 | 1.19                |    | 0.99        | 1.42        |
| <b>Employment</b>                      |     |      |                     |    |             |             |
| Unemployed                             | 298 | 23.1 | ref                 |    |             |             |
| Employed                               | 139 | 16.8 | <b>.71</b>          | *  | <b>.55</b>  | <b>.89</b>  |
| Housewife /on maternity leave          | 106 | 23.7 | .84                 |    | .64         | 1.11        |
| Retired due to age or disability       | 343 | 35.6 | 1.16                |    | .87         | 1.56        |
| <b>Displacement status</b>             |     |      |                     |    |             |             |
| Returnee                               | 257 | 21.2 | ref                 |    |             |             |
| New IDP                                | 92  | 27.5 | .93                 |    | .70         | 1.24        |
| Old IDP                                | 542 | 26.4 | .84                 |    | .62         | 1.15        |
| <b>Health Insurance</b>                |     |      |                     |    |             |             |
| No insurance                           | 268 | 18.0 | ref                 |    |             |             |
| Private or corporate insurance         | 18  | 23.7 | 1.44                |    | .82         | 2.53        |
| Government scheme                      | 602 | 29.8 | <b>1.55</b>         | ** | <b>1.30</b> | <b>1.86</b> |
| <b>PTSD<sup>1</sup></b>                |     |      |                     |    |             |             |
| No current disorder symptoms           | 556 | 20.2 | ref                 |    |             |             |
| Current disorder symptoms              | 335 | 39.7 | <b>1.56</b>         | ** | <b>1.29</b> | <b>1.90</b> |
| <b>Depression<sup>2</sup></b>          |     |      |                     |    |             |             |
| No current disorder                    | 642 | 20.8 | ref                 |    |             |             |
| Current Disorder                       | 250 | 48.2 | <b>2.12</b>         | ** | <b>1.70</b> | <b>2.65</b> |
| <b>Co-morbidity<sup>3 ***</sup></b>    |     |      |                     |    |             |             |
| Symptoms of one or no current disorder | 675 | 21.5 | ref                 |    |             |             |
| Symptoms of more than one disorder     | 217 | 47.4 | <b>2.29</b>         | ** | <b>1.85</b> | <b>2.84</b> |

Separate regression model run for (1) socio-demographic variables and current PTSD and current depression symptoms; (2) socio-demographic variables and comorbidity. The results for socio-demographic variables, PTSD symptoms and depression symptoms are shown from the first model. There were no statistically significant difference in the results of socio-demographic variables between the first and the second model.

<sup>1</sup> = TSQ score >6.

<sup>2</sup> = PHQ-9 score of ≥10.

<sup>3</sup> = GAD-7 score of ≥10.

\* p < 0.05.

\*\* p < 0.01.

\*\*\* Co-morbidity is current symptoms more than 1 disorder of PTSD, depression and anxiety.

doi:10.1371/journal.pone.0122673.t005

population [6],[29],[25],[30],[31] and among civilian population [32]. As expected, co-existence of more than one disorder was associated with increased use of health services [33].

To put our results into a broader context, estimates of a treatment gap (i.e. the proportion of individuals who require mental health care but do not receive treatment) among non-conflict-affected persons in the WHO Europe region vary from 45% for people with Major Depression to 62% for people with Generalized Anxiety Disorder [34]. More globally, treatment gaps for serious cases of mental disorders are estimated at around 35–50% in developed countries and 76–85% in less-developed countries [1] [35]. However, it is not possible to directly compare such estimates with our study findings due to different criteria and methodologies used. Indeed, reliable data on mental health service utilisation and treatment gaps is extremely limited globally [35], and substantially more evidence on this is required, especially with conflict-affected populations.

Participation in the government's general insurance scheme was positively associated with service utilization and especially GPs. However, despite this, costs related to services and drugs still represent major barrier for many. This finding is supported by other research conducted in Georgia (but not specifically on mental health) showing that the government's general insurance scheme beneficiaries are more likely than non-beneficiaries to use general practitioners and specialist services [36] and pay less out-of-pocket payments for health services [37], [13]. However pharmaceuticals costs appear to have a high financial burden for both beneficiaries and non-beneficiaries [13]. Costs related to drugs are main cost drivers and a cause of catastrophic health expenditure [38]. The other factor that may aggravate drug costs related barrier in mental health treatment is poor utilization of specialized mental health services. The patients enrolled in the SPMH are provided with the free medications. In our study every second of those who self-reported mental health problems but did not seek care mentioned costs related to medication as a barrier to access care. This might suggest that population is not well informed about benefits of the state program. The SPMH implemented by specialized outpatient mental health clinics (dispensaries) covers treatment of majority of mental health conditions including moderate and severe depressive episodes, recurrent depressive disorder and PTSD. Anxiety disorders such as phobic anxiety and other anxiety disorders are not included in the program coverage, meaning that the patient with these diagnoses should pay for consultation and purchase drug if needed. Medications provided by the state program are mainly low cost old generation drugs and generics. Only 2.3% of our study population with mental health disorders used outpatient mental health services and all of them received drug benefits from the program. Although the numbers are small it could indicate that psychiatric dispensaries are mainly visited for medications.

The majority of individuals with current symptoms of a mental disorder used pharmacy services and about one sixth used only a pharmacy without consulting a health professional. Such practice is referred as self-treatment because the pharmacist, if consulted, is not professional to prescribe medications for mental conditions. Self-treatment is common in the Georgian population [39] and it was found to be higher among uninsured persons as suggested by our study. Although the government's general insurance scheme benefit package does not cover mental health drugs, extra costs related to service use for uninsured individuals is additional financial barrier prompting them to self-treatment. Self-treatment was supported by existing legal environment that did not restrict non-prescribed drug purchase at the pharmacies with exception of selected list of controlled narcotic drugs. Recent changes in the regulations imposed restrictions on majority of drugs, including those related to mental health.

Relatively high use of GP consultations (46.6%) may reflect the gate keeping role of primary care enforced by the government's general insurance scheme. Also people with mental disorders may have other physical complaints that prompt them to seek care from GPs. Interestingly about one third used only the GP service without referring to other specialists. GPs should be able to recognise mental health disorders and manage mild depressive episodes, while referring

more severe cases to psychiatrists. They are also authorised to prescribe antidepressants, however real quality of services with regards to mental health provided by GPs is not known and was not explored by our study.

As expected, neurologists at primary or secondary level are main access points for mental health treatment. They are equally consulted by insured and uninsured persons. The explanation could be that neurologists are main health care providers from which care is sought in case of mental and behavioural problems, although they have not been recognized as such in the policy decisions of the government. As pathways of treatment were not investigated we may assume that those who were insured were referred by GPs to neurologists, while uninsured most likely access neurologists directly bypassing general practitioners. However, this assumption needs further exploration and research.

High utilization of neurologist services and low utilization of specialized mental health services could be explained by stigma associated with seeking psychiatric care. Stigma as a major barrier to use psychiatric care has been documented by various studies [40], [41], [42]. In Georgia psychiatric outpatient clinics (dispensaries) are not integrated in the primary care, they are stand-alone facilities or attached to the psychiatric hospitals. Such model contributes to stigmatization of mental illness. Our study did not explore stigma and therefore this should be a subject for further research in Georgia.

The other factor that explains low use of specialized mental health services is poor quality of the government funded outpatient psychiatric care. A recent qualitative study that explored barriers in mental health care in Georgia identified poorly funded, low resourced outpatient psychiatric care as the most challenging among mental health services. There is low utilization of modern treatment modalities and existing funding models do not contribute to the quality improvement. There is no continuum of care and patients discharged from inpatient mental facilities are not followed-up. The staff is demotivated and overburdened. Due to absence of financial incentives the psychiatric field is not attractive to young doctors. [43]. A shortage of qualified staff is a recognized obstacle to mental health reform initiative in Georgia [12]. Psychosocial rehabilitation is provided by a few outpatient facilities under the SPMH, limited NGOs under the donor financial support and private clinics. The majority of respondents with current mental disorders reported receiving medication treatment, with very few receiving psychotherapy or psychosocial support, indicating possible over-medicalization. This reflects the limited coverage by additional services such as by NGOs and the unaffordability of costly private services.

In our sample about one third of those who screened for current mental disorder symptoms did not acknowledge having a problem requiring professional help. This possibly suggests poor mental health knowledge among the study population. There is growing evidence that poor mental health knowledge negatively influences decisions about mental health treatment [44], [45]. Other explanation could be self-reliance, which also is considered as barrier in not receiving care [46], [47]. On the other hand, not all mental disorders, especially mild conditions require treatment [48].

Utilization of services is affected by many interacting factors, such as individual and help-seeking preferences, access, availability of services and referral practices [49]. Health service utilization for mental health has not been studied in general population of Georgia. This once again underlines importance of our research as the study among war affected population may also provide some insight about utilization patterns in the general population in Georgia. No similar quantitative studies have been conducted in the neighbouring countries of Armenia and Azerbaijan.

The Global Burden of Disease (2010) study identified mental health disorders as a leading cause of burden. It is estimated that depressive disorders are second leading cause of years lived

with disability in Eastern Europe [50]. To reduce this disease burden the government of Georgia should consider mental health as a public health priority and implement cost-effective interventions. A mental health reform has been recently initiated in Georgia. One of the directions and major challenges of the reform process is to integrate fragmented programs and services and close the treatment gap, including for war-affected populations in Georgia. However, in view of the magnitude of the problem, the government should make more proactive steps to meet the needs of people with mental disorders.

## Limitations

The study is subject to several limitations. The cross-sectional design precludes determining the direction of causation. In our study we present data on symptoms of mental health disorders rather than diagnosed mental disorders case. The period of such symptoms (within the past 1 or 2 weeks) differed from the period for the question on utilising health care for emotional and behavioural problems (1 year). It is possible that individuals may have remitted during last 12 months without treatment or due to successful treatment and such individuals would not classify for having current symptoms. In addition, the presence of symptoms of a mental disorder may not, in fact, indicate a need for care because those with mild conditions could remit without treatment. Thus we might have underestimated health service utilization rate in relation to real need. The wording of the question on seeking care for mental, behavioural or emotional problems during last 12 month could also lead to capturing those who actually did not have mental disorders. The study did not investigate participants' experiences with health services, their satisfaction with received care, the quality of care, the pathways of care and the costs related to services and drugs. Another deficiency is that definitions of the counseling, psychotherapy and psychosocial support were not given which may have caused confusion in understanding. The study is also subject to recall bias as service use was measured for the last 12 months period. Selection biases should also be taken into consideration. IDPs hosted by relatives or friends or living independently away from the IDPs settlements were not included in the study. It is unclear whether this segment of IDPs have different service utilization pattern than those residing in collective centers. Another limitation was that we did not perform inter-rater reliability test for the data collectors. Lastly, the study instruments were not developed specifically for the study population and so may be prone to lack of cultural validity. However, they did go through a rigorous translation, adaption and piloting process, and the psychometric properties of the instruments were also tested and shown to be good (see above).

## Conclusions

The study suggests there is limited use of formal health services for mental health problems among war-affected population in Georgia with self-reported mental, emotional and behavioural problems and symptoms of mental disorders. This appears due to barriers such as costs of services and drugs. Reducing financial access barriers, especially for drugs, seems critical and the government in Georgia should consider expanding outpatient drug benefits and including the drugs needed for management of mental disorders. Another noteworthy finding of this study is that GPs and non-mental health specialists (neurologists) are the main service providers of "mental health services". In contrast, specialised care is extremely underused and appears used only for free drug benefits. While many patients with mental health problems present to primary care, the real benefit to the patient is questionable unless the capabilities of primary health care are enhanced to deal with mental disorders. Integration of mental health into primary care with improved capacity of primary care providers, multidisciplinary treatment

approach, and improved referral pathways could result in the more timely identification and successful management of mental disorders among war-affected persons in Georgia.

## Acknowledgments

The authors would like to thank all the respondents and staff who contributed to this study.

## Author Contributions

Conceived and designed the experiments: IC NM BR GG VP MM. Performed the experiments: NR NM MU. Analyzed the data: IC MU. Contributed reagents/materials/analysis tools: BR IC NM. Wrote the paper: IC NM. Reviewed the manuscript: GG BR MM VP.

## References

1. World Health Organisation. Mh GAP intervention guide for mental, neurological and substance use disorders in non-specialized health settings: mental health Gap Action Programme (mhGAP). Geneva: WHO.2010. Available: [http://whqlibdoc.who.int/publications/2010/9789241548069\\_eng.pdf?ua=1](http://whqlibdoc.who.int/publications/2010/9789241548069_eng.pdf?ua=1).
2. Alonso J, Codony M, Kovess V, Angermeyer MC, Katz SJ, Haro JM et al. Population level of unmet need for mental healthcare in Europe. *Br J Psychiatry*. 30 March 2007; 190:299–306. doi: [10.1192/bjp.bp.106.022004](https://doi.org/10.1192/bjp.bp.106.022004) PMID: [17401035](https://pubmed.ncbi.nlm.nih.gov/17401035/)
3. Kohn R, Saxena S, Levav I, Saraceno B. The treatment gap in mental health care. *Bulletin of the World Health Organization*. November 2004; 82:858–866. PMID: [15640922](https://pubmed.ncbi.nlm.nih.gov/15640922/)
4. Steel Z, Chey T, Silove D, Marnane C, Bryant RA, Ommeren MV. Association of torture and other potentially traumatic events with mental health outcomes among populations exposed to mass conflict and displacement: a systematic review and meta-analysis. *JAMA*. 5 August 2009; 302(5): p. 537–49 doi: [10.1001/jama.2009.1132](https://doi.org/10.1001/jama.2009.1132) PMID: [19654388](https://pubmed.ncbi.nlm.nih.gov/19654388/)
5. Porter M, Haslam N. Predisplacement and postdisplacement factors associated with mental health of refugees and internally displaced persons: a meta-analysis. *JAMA*. 2005; 294(5):602–612. doi: [10.1001/jama.294.5.602](https://doi.org/10.1001/jama.294.5.602) PMID: [16077055](https://pubmed.ncbi.nlm.nih.gov/16077055/)
6. Sabes-Figuera R, McCrone P, Bogic M, Ajdukovic D, Franciskovic T, Colombini N. et al. Long-Term Impact of War on Healthcare Costs: An Eight-Country Study. *PLoS One*. 4 January 2012; 7(1):e29603. doi: [10.1371/journal.pone.0029603](https://doi.org/10.1371/journal.pone.0029603) PMID: [22238627](https://pubmed.ncbi.nlm.nih.gov/22238627/)
7. IDMC Georgia, IDP profile, March 2012. Available: <http://www.internal-displacement.org/europe-the-caucasus-and-central-asia/georgia/>.
8. Ministry of Internally Displaced Persons from the Occupied Territories, Accommodation and Refugees of Georgia. 5 September 2013. Available: [www.http://mra.gov.ge](http://mra.gov.ge).
9. WHO/Children of Georgia, An assessment of the mental health and psychosocial support needs of the conflict-affected populations. October 2009;
10. Amnesty International, In the Waiting Room: Internally Displaced People in Georgia. 4 August 2010.
11. John Hopkins Bloomberg School of Public Health. Aging in Displacement: Assessing Health Status of Displaced Older Adults in the Republic of Georgia. April 2012. Available: [http://www.jhsph.edu/research/centers-and-institutes/center-for-refugee-and-disaster-response/publications\\_tools/GEORGIA%20PRM%20OLDER%20ADULT%20STUDY%2001May2012.pdf](http://www.jhsph.edu/research/centers-and-institutes/center-for-refugee-and-disaster-response/publications_tools/GEORGIA%20PRM%20OLDER%20ADULT%20STUDY%2001May2012.pdf).
12. Makhashvili N, van Voren R. Balancing Community and Hospital Care: A Case Study of Reforming Mental Health Services in Georgia. *PLoS Med*. 2013; 10(1):e1001366. doi: [10.1371/journal.pmed.1001366](https://doi.org/10.1371/journal.pmed.1001366) PMID: [23319895](https://pubmed.ncbi.nlm.nih.gov/23319895/)
13. Zoidze A, Rukhadze N, Chkhatarashvili K, Gotsadze G. Promoting universal financial protection: health insurance for the poor in Georgia—a case study. *Health Res Policy Syst*. 15 November 2013; 11:45. doi: [10.1186/1478-4505-11-45](https://doi.org/10.1186/1478-4505-11-45) PMID: [24228796](https://pubmed.ncbi.nlm.nih.gov/24228796/)
14. Government of Georgia resolution #218 on Georgian government resolution #218 on defining health insurance voucher conditions for population to be insured under the 2010 state programs on “Health insurance of people under the poverty line”, “Health insurance of peoples’ artists, people’s actors and Rustaveli Prize laureates”, “Health insurance of internally displaced persons living in collective centers”, “Health insurance of homeless children”, 9 December 2009; (in Georgian)
15. Makhashvili N, Chikovani I, McKee M, Bisson J, Patel V, Roberts B. Mental disorders and their association with disability among internally displaced persons and returnees in Georgia. *J Trauma Stress*. 16 October 2014; 27(5):509–18. doi: [10.1002/jts.21949](https://doi.org/10.1002/jts.21949) PMID: [25322880](https://pubmed.ncbi.nlm.nih.gov/25322880/)

16. Singh N, S. Care-Seeking for Mental Illness Among Protracted IDPs in Georgia. Psycho-Social Services and Training Institute Urban Conference. Cairo, Egypt, 11 April 2012; Available: [mhps.net/?get=162/1382086439](http://mhps.net/?get=162/1382086439). Accessed 10 October 2014.
17. Roberts B, Chikovani I, Makhshvili N, Patel V, McKee M. Tobacco use and nicotine dependence among conflict-affected men in the Republic of Georgia. *Int J Environ Res Public Health* May 29 2013; 10(6):2185–97. doi: [10.3390/ijerph10062185](https://doi.org/10.3390/ijerph10062185) PMID: [23759953](https://pubmed.ncbi.nlm.nih.gov/23759953/)
18. Roberts B, Murphy A, Chikovani I, Makhshvili N, Patel V, et al. Individual and community level risk-factors for alcohol use disorder among conflict-affected persons in Georgia. *PLoS One*. May 27 2014; 9(5):e98299. doi: [10.1371/journal.pone.0098299](https://doi.org/10.1371/journal.pone.0098299) PMID: [24865450](https://pubmed.ncbi.nlm.nih.gov/24865450/)
19. Brewin CR, Rose S, Andrews B, Green J, Tata P, McEvedy C, et al. Brief screening instrument for post-traumatic stress disorder. *Br J Psychiatry*. August 2002; 181:158–62. doi: [10.1192/bjp.181.2.158](https://doi.org/10.1192/bjp.181.2.158) PMID: [12151288](https://pubmed.ncbi.nlm.nih.gov/12151288/)
20. Kroenke K, Spitzer RL, Williams JB. The PHQ-9: validity of a brief depression severity measure. *J Gen Intern Med*. September 2001; 16(9):606–13. doi: [10.1046/j.1525-1497.2001.016009606.x](https://doi.org/10.1046/j.1525-1497.2001.016009606.x) PMID: [11556941](https://pubmed.ncbi.nlm.nih.gov/11556941/)
21. Spitzer RL, Kroenke K, Williams JB, Löwe B. A brief measure for assessing generalized anxiety disorder: the GAD-7. *Arch Intern Med*. May 22 2006; 166(10):1092–7. doi: [10.1001/archinte.166.10.1092](https://doi.org/10.1001/archinte.166.10.1092) PMID: [16717171](https://pubmed.ncbi.nlm.nih.gov/16717171/)
22. Van Ommeren M, Sharma B, Thapa S, Makaju R, Prasain D, Bhattarai R, et al. Preparing instruments for transcultural research: Use of the translation monitoring form with Nepali-speaking Bhutanese refugees. *Transcultural Psychiatry*, September 1999; 36, 285–301.
23. Eytan A, Gex-Farby M. Use of healthcare services 8 years after the war in Kosovo: role of post-traumatic stress disorder and depression. *Eur J Public Health*. October 2012; 22(5):638–43. PMID: [21746748](https://pubmed.ncbi.nlm.nih.gov/21746748/)
24. Morina N, Emmelkamp PM. Health care utilization, somatic and mental health distress, and well-being among widowed and non-widowed female survivors of war. *BMC Psychiatry*. May 11 2012; 12:39. doi: [10.1186/1471-244X-12-39](https://doi.org/10.1186/1471-244X-12-39) PMID: [22578096](https://pubmed.ncbi.nlm.nih.gov/22578096/)
25. Frančišković T, Šuković Z, Tovilović Z, Ajduković D, Bogić M, Kučukalić A. et al. The utilization and perceived usefulness of health care and other support services by people exposed to traumatic events related to the war in the Balkans. *Acta Med Acad*. 2013; 42(1):4–14. doi: [10.5644/ama2006-124.65](https://doi.org/10.5644/ama2006-124.65) PMID: [23735061](https://pubmed.ncbi.nlm.nih.gov/23735061/)
26. Francisković T, Tovilović Z, Suković Z, Stevanović A, Ajduković D, Kraljević R, et al. Health care and community-based interventions for war-traumatized people in Croatia: community-based study of service use and mental health. *Croat Med J*. 2008; 49:483–90. doi: [10.3325/cmj.2008.4.483](https://doi.org/10.3325/cmj.2008.4.483) PMID: [18716995](https://pubmed.ncbi.nlm.nih.gov/18716995/)
27. Alonso J, Angermeyer MC, Bernert S, Bruffaerts R, Brugha TS, Bryson H. Use of mental health services in Europe: results from the European Study of the Epidemiology of Mental Disorders (ESEMeD) project. *Acta Psychiatr Scand Suppl*. 2004; (420):47–54. PMID: [15128387](https://pubmed.ncbi.nlm.nih.gov/15128387/)
28. Bush PW, Drake RE, Xie H, McHugo GJ, Haslett WR. The long-term impact of employment on mental health service use and costs for persons with severe mental illness. *Psychiatr Serv*. August 2009; 60(8):1024–31. doi: [10.1176/appi.ps.60.8.1024](https://doi.org/10.1176/appi.ps.60.8.1024) PMID: [19648188](https://pubmed.ncbi.nlm.nih.gov/19648188/)
29. Eytan A, Toscani L, Loutan L, Bovier PA. Posttraumatic stress disorder and the use of general health services in postwar Kosovo. *J Trauma Stress*. February 2006; 19(1):57–67. PMID: [16568462](https://pubmed.ncbi.nlm.nih.gov/16568462/)
30. Calhoun PS, Bosworth HB, Grambow SC, Dudley TK, Beckham JC. Medical service utilization by veterans seeking help for posttraumatic stress disorder. *Am J Psychiatry*. December 2002; 159(12):2081–6. PMID: [12450960](https://pubmed.ncbi.nlm.nih.gov/12450960/)
31. Schnurr PP, Friedman MJ, Sengupta A, Jankowski MK, Holmes T. PTSD and utilization of medical treatment services among male Vietnam veterans. *J Nerv Ment Dis*. August 2000; 188(8):496–504. PMID: [10972568](https://pubmed.ncbi.nlm.nih.gov/10972568/)
32. Kartha A, Brower V, Saitz R, Samet JH, Keane TM, Liebschutz J. The impact of trauma exposure and post-traumatic stress disorder on healthcare utilization among primary care patients. *Med Care*. April 2008; 46(4):388–93. doi: [10.1097/MLR.0b013e31815dc5d2](https://doi.org/10.1097/MLR.0b013e31815dc5d2) PMID: [18362818](https://pubmed.ncbi.nlm.nih.gov/18362818/)
33. Andrews G, Henderson S, Hall W. Prevalence, comorbidity, disability and service utilisation Overview of the Australian National Mental Health Survey. *Br J Psychiatry*. February 2001; 178:145–53. PMID: [11157427](https://pubmed.ncbi.nlm.nih.gov/11157427/)
34. Kohn R, Saxena S, Levav I, Saraceno B. The treatment gap in mental health care. *Bull World Health Organ*. November 2004; 82(11): 858–866. PMID: [15640922](https://pubmed.ncbi.nlm.nih.gov/15640922/)
35. Wang PS, Aguilar-Gaxiola S, Alonso J, Angermeyer MC, Borges G, Bromet EJ. et al. Worldwide use of mental health services for anxiety, mood, and substance disorders: results from 17 countries in the



- WHO World Mental Health (WMH) Surveys. *Lancet*. September 8 2007; 370(9590): 841–850. doi: [10.1016/S0140-6736\(07\)61414-7](https://doi.org/10.1016/S0140-6736(07)61414-7) PMID: [17826169](https://pubmed.ncbi.nlm.nih.gov/17826169/)
36. UNICEF, USAID HSSP. Survey of Barriers to Access to Social Services in Georgia in 2010: why not all poor families get social benefits and services? Survey Report. November 2011; Available:[www.unicef.org/georgia/BASS\\_final-eng.pdf](http://www.unicef.org/georgia/BASS_final-eng.pdf). Accessed 13 November 2013.
  37. S. Bauhoff, D. Hotchkiss and O. Smith. The impact of medical insurance for the poor in Georgia: a regression discontinuity approach. *Health Economics*. 14 October 2010; pp. 1362-1378. doi: [10.1002/hec.1673](https://doi.org/10.1002/hec.1673)
  38. Gotsadze G, Zoidze A, Rukhadze N. Household catastrophic health expenditure: evidence from Georgia and its policy implications. *BMC Health Serv Res*. 2009; 9: 69. doi: [10.1186/1472-6963-9-69](https://doi.org/10.1186/1472-6963-9-69) PMID: [19400939](https://pubmed.ncbi.nlm.nih.gov/19400939/)
  39. Balabanova D, Roberts B, Richardson E, Haerpfer C, McKee M. Health care reform in the former Soviet Union: beyond the transition. *Health Serv Res*. April 2012; 47(2): 840–864 doi: [10.1111/j.1475-6773.2011.01323.x](https://doi.org/10.1111/j.1475-6773.2011.01323.x) PMID: [22092004](https://pubmed.ncbi.nlm.nih.gov/22092004/)
  40. Mann CE, Himelein MJ. Factors associated with stigmatization of persons with mental illness. *Psychiatr Serv*. February 2004; 55(2):185–7. PMID: [14762246](https://pubmed.ncbi.nlm.nih.gov/14762246/)
  41. Rao H, Mahadevappa H, Pillay P, Sessay M, Abraham A, Luty J. A study of stigmatized attitudes towards people with mental health problems among health professionals. *JPsychiatrMent Health Nurs*. April 2009; 16(3):279–84. doi: [10.1111/j.1365-2850.2008.01369.x](https://doi.org/10.1111/j.1365-2850.2008.01369.x) PMID: [19291157](https://pubmed.ncbi.nlm.nih.gov/19291157/)
  42. Abbey S, Charbonneau M, Tranulis C, Moss P, Baici W, Dabby L. et al. Stigma and discrimination [position paper] *Can J Psychiatry*. 2011; 13(10):1–9.
  43. Curatio International Foundation. Barriers of Mental Health in Georgia. Challenges and Possible Solutions. Financial Barriers Study Findings. Policy brief. 2014; Available: <http://goo.gl/3ca0hm>. Accessed 10 October 2014. doi: [10.13140/2.1.3460.1760](https://doi.org/10.13140/2.1.3460.1760)
  44. Ten Have M, de Graaf R, Vilagut G, Kovess V, Alonso J, et al. Are attitudes towards mental health help-seeking associated with service use? Results from the European Study of Epidemiology of Mental Disorders. *Soc Psychiatry PsychiatrEpidemiol*. 2010; 45: 153–163. doi: [10.1007/s00127-009-0050-4](https://doi.org/10.1007/s00127-009-0050-4) PMID: [19381427](https://pubmed.ncbi.nlm.nih.gov/19381427/)
  45. Rüsçh N, Evans-Lacko SE, Henderson C, Flach C, Thornicroft G. Knowledge and attitudes as predictors of intentions to seek help for, and disclose, a mental illness. *PsychiatrServ*. 2011; 62: 675–678. doi: [10.1176/appi.ps.62.6.675](https://doi.org/10.1176/appi.ps.62.6.675) PMID: [21632739](https://pubmed.ncbi.nlm.nih.gov/21632739/)
  46. Prins M, Meadows G, Bobevski I, Graham A, Verhaak P, van der Meer K. Perceived need for mental health care and barriers to care in the Netherlands and Australia. *Soc Psychiatry Psychiatr Epidemiol*. 2011 Oct; 46(10):1033–44. doi: [10.1007/s00127-010-0266-3](https://doi.org/10.1007/s00127-010-0266-3) PMID: [20686887](https://pubmed.ncbi.nlm.nih.gov/20686887/)
  47. Ortega AN, Alegría M. Self-reliance, mental health need, and the use of mental healthcare among island Puerto Ricans. *Ment Health Serv Res*. 2002 Sep; 4(3):131–40. PMID: [12385566](https://pubmed.ncbi.nlm.nih.gov/12385566/)
  48. Demyttenaere K, Bruffaerts R, Posada-Villa J, Gasquet I, Kovess V, Lepine JP. et al. Prevalence, severity, and unmet need for treatment of mental disorders in the World Health Organization World Mental Health Surveys. *JAMA*. 2004 Jun 2; 291(21):2581–90. PMID: [15173149](https://pubmed.ncbi.nlm.nih.gov/15173149/)
  49. Costello EJ, Pescosolido BA, Angold A, Burns BJ. A family network-based model of access to child mental health services. *Research in Community and Mental Health: Social Networks and Mental Illness*. 1998; 9:165–190
  50. Ferrari AJ, Charlson FJ, Norman RE, Patten SB, Freedman G, Murray CJ. et al. (2013 Nov) Burden of depressive disorders by country, sex, age, and year: findings from the global burden of disease study 2010. *PLoS Med*. 2013 Nov; 10(11):e1001547. doi: [10.1371/journal.pmed.1001547](https://doi.org/10.1371/journal.pmed.1001547) PMID: [24223526](https://pubmed.ncbi.nlm.nih.gov/24223526/)
